# Supplementary material
Source: publisher figshare collection journal article supplement (https://gsajournals.figshare.com/articles/dataset/_/11952225)
Supplement: Supplementary file 2 [file 1]

**Table S1 – Interactions between genotypes and environments/panels**

| <b>Trait</b> | <b><math>\rho_R</math>: correlation in reference genotype means<br/>(p-value)</b> | <b><math>\rho_G</math>: correlation in genomic effects<br/>(p-value)</b> |
|--------------|-----------------------------------------------------------------------------------|--------------------------------------------------------------------------|
| <b>DTS</b>   | 0.93 ( $1.0 \times 10^{-10}$ )                                                    | 1.0 ( $4.6 \times 10^{-21}$ )                                            |
| <b>PH</b>    | 0.65 ( $8.2 \times 10^{-4}$ )                                                     | 0.78 ( $2.9 \times 10^{-8}$ )                                            |
| <b>GY</b>    | 0.34 (0.13)                                                                       | 0.30 (0.13)                                                              |

Trait: days to silking (DTS), plant height (PH), grain yield adjusted for DTS (GY).  $\rho_R$ :

correlation in estimated genotype means, only for reference lines tested in both panels; p-values

were estimated by t-tests.  $\rho_G$ : correlation in genomic breeding values, based on a polygenic

marker-by-panel interaction model fitted in Ames-H and NAM-H; p-values were estimated by

likelihood ratio tests.
