# Supplementary material
Source: publisher figshare collection journal article supplement (https://gsajournals.figshare.com/articles/dataset/_/11952225)
Supplement: Supplementary file 3 [file 1]

**Table S5 – Prediction accuracy in NAM-H by directional effects of inbreeding in Ames-H**

| <b>Trait</b> | <b>Prediction accuracy (p-value)</b> | <b>Difference in prediction accuracy (p-value)</b>                |
|--------------|--------------------------------------|-------------------------------------------------------------------|
|              | <b>DGBLUP</b>                        | <b>DGBLUP + Genomic inbreeding (linear and quadratic effects)</b> |
| <b>DTS</b>   | 0.319 ( $2.9 \times 10^{-11}$ )      | -0.002 (0.38)                                                     |
| <b>PH</b>    | 0.259 ( $8.0 \times 10^{-10}$ )      | +0.002 (0.52)                                                     |
| <b>GY</b>    | -0.011 (0.71)                        | -0.000 (0.99)                                                     |

Prediction accuracy: average correlation between observed and predicted phenotypes in NAM-H, over 24 populations; Difference in prediction accuracy: difference between the dominance GBLUP model (DGBLUP) and DGBLUP model incorporating  $F$  and  $F^2$  as fixed effects ( $F$ : genomic inbreeding coefficient). Significance of average prediction accuracies (non-zero mean) and estimated differences in prediction accuracy (non-zero difference, paired by NAM-H population) was assessed by t-tests.
