# Supplementary material
Source: publisher figshare collection journal article supplement (https://gsajournals.figshare.com/articles/dataset/_/11952225)
Supplement: Supplementary file 4 [file 1]

**Table S9 – Prediction accuracy of functional enrichment models**

| Validation scheme         | Baseline model | Trait | Prediction accuracy (p-value)  | Difference in prediction accuracy (p-value) |                                |                                |                                |                                |
|---------------------------|----------------|-------|--------------------------------|---------------------------------------------|--------------------------------|--------------------------------|--------------------------------|--------------------------------|
|                           |                |       |                                | Gene                                        | Rec.                           | MNase HS                       | MAF                            | GERP                           |
| <b>Ames-H<br/>⇒ NAM-H</b> | DGBLUP         | DTS   | 0.319 (2.9×10 <sup>-11</sup> ) | +0.013 (3.3×10 <sup>-4</sup> )              | +0.019 (0.021)                 | +0.007 (0.24)                  | -0.012 (0.21)                  | +0.012 (0.015)                 |
|                           |                | PH    | 0.259 (8×10 <sup>-10</sup> )   | +0.029 (0.023)                              | +0.007 (0.71)                  | +0.019 (0.17)                  | +0.001 (0.87)                  | +0.019 (0.093)                 |
|                           |                | GY    | -0.011 (0.711)                 | +0.010 (0.085)                              | +0.025 (3.1×10 <sup>-3</sup> ) | +0.012 (0.14)                  | -0.007 (0.71)                  | +0.010 (0.16)                  |
|                           | DGBLUP+Gene    | DTS   | 0.332 (1.2×10 <sup>-11</sup> ) | -                                           | +0.011 (0.14)                  | +0.001 (0.74)                  | N/A                            | -0.001 (0.55)                  |
|                           |                | PH    | 0.288 (1.1×10 <sup>-10</sup> ) | -                                           | N/A                            | -0.002 (0.59)                  | +0.000 (0.97)                  | -0.006 (0.14)                  |
|                           |                | GY    | -0.001 (0.98)                  | -                                           | +0.014 (0.015)                 | +0.003 (0.52)                  | -0.000 (0.98)                  | -0.000 (0.99)                  |
| <b>NAM-H<br/>⇒ Ames-H</b> | GBLUP          | DTS   | 0.497 (4.8×10 <sup>-9</sup> )  | -0.000 (0.81)                               | +0.011 (1.0×10 <sup>-3</sup> ) | +0.018 (3.6×10 <sup>-4</sup> ) | -0.012 (0.038)                 | +0.019 (8.6×10 <sup>-5</sup> ) |
|                           |                | PH    | 0.052 (0.079)                  | +0.078 (1.1×10 <sup>-4</sup> )              | +0.052 (1.1×10 <sup>-3</sup> ) | +0.072 (7.0×10 <sup>-5</sup> ) | +0.006 (1.8×10 <sup>-4</sup> ) | +0.071 (6.0×10 <sup>-4</sup> ) |
|                           |                | GY    | 0.254 (2.7×10 <sup>-6</sup> )  | -0.014 (0.11)                               | +0.021 (0.087)                 | -0.040 (7.1×10 <sup>-3</sup> ) | +0.003 (0.55)                  | +0.026 (8.2×10 <sup>-3</sup> ) |
|                           | GBLUP+Gene     | DTS   | 0.497 (3.8×10 <sup>-9</sup> )  | -                                           | +0.013 (2.8×10 <sup>-4</sup> ) | +0.019 (4.5×10 <sup>-4</sup> ) | -0.022 (4.8×10 <sup>-3</sup> ) | +0.019 (1.6×10 <sup>-4</sup> ) |
|                           |                | PH    | 0.131 (2.8×10 <sup>-4</sup> )  | -                                           | -0.000 (1.4×10 <sup>-3</sup> ) | +0.001 (0.028)                 | +0.000 (1.6×10 <sup>-3</sup> ) | -0.003 (0.42)                  |
|                           |                | GY    | 0.240 (1.1×10 <sup>-6</sup> )  | -                                           | +0.020 (8.9×10 <sup>-4</sup> ) | -0.026 (2.9×10 <sup>-3</sup> ) | +0.004 (0.56)                  | +0.040 (5.4×10 <sup>-6</sup> ) |

Validation scheme: training panel ⇒ validation panel; Baseline model: DGBLUP (polygenic additive and dominance effects) or DGBLUP+Gene

(extension of DGBLUP by gene-proximity annotations) in Ames-H, GBLUP (polygenic additive effects only) or GBLUP+Gene (extension of GBLUP by gene-proximity annotations) in NAM-H; Prediction accuracy: average correlation between observed and predicted phenotypes in validation sets, from the baseline model; Difference in prediction accuracy: difference in prediction accuracy between the baseline model and its extension by one of the following annotations: Gene, proximity to genes ( $\leq 1$  kb of an annotated gene); Rec., recombination rate; MNase HS, chromatin openness; MAF, minor allele frequency; GERP, genomic evolutionary rate profiling score. Significance of average prediction accuracies (non-zero mean) and estimated differences in prediction accuracy (non-zero difference, paired by validation set) was assessed by t-tests.

N/A: the fitting algorithm could not converge to a solution.
