# Supplementary material
Source: publisher figshare collection journal article supplement (https://gsajournals.figshare.com/articles/dataset/_/11952225)
Supplement: Supplementary file 5 [file 1]

**Table S8 – Genomic heritability captured by functional classes**

| Feature         | Bin              | Genomic heritability<br>(Proportion of genomic heritability explained) |                   |                   |                   |                    |                    |
|-----------------|------------------|------------------------------------------------------------------------|-------------------|-------------------|-------------------|--------------------|--------------------|
|                 |                  | Ames-H                                                                 |                   |                   | NAM-H             |                    |                    |
|                 |                  | DTS                                                                    | PH                | GY                | DTS               | PH                 | GY                 |
| <b>Gene</b>     | Non-genic        | <b>0.40 (43%)</b>                                                      | 0.00 (0%)         | 0.03 (5%)         | <b>0.19 (25%)</b> | 0.00 (0%)          | 0.00 (0%)          |
|                 | Genic            | <b>0.20 (22%)</b>                                                      | <b>0.58 (76%)</b> | <b>0.36 (55%)</b> | <b>0.56 (75%)</b> | <b>0.72 (100%)</b> | <b>0.49 (100%)</b> |
|                 | Non-genic (D)    | 0.01 (1%)                                                              | 0.00 (0%)         | 0.10 (16%)        |                   |                    |                    |
|                 | Genic (D)        | <b>0.32 (34%)</b>                                                      | <b>0.18 (24%)</b> | <b>0.16 (25%)</b> |                   |                    |                    |
| <b>Rec.</b>     | < 0.45           | 0.11 (12%)                                                             | 0.00 (0%)         | 0.01 (2%)         | 0.04 (5%)         | 0.03 (5%)          | 0.01 (2%)          |
|                 | (0.45, 1.65)     | <b>0.41 (44%)</b>                                                      | <b>0.17 (22%)</b> | <b>0.14 (21%)</b> | <b>0.42 (55%)</b> | <b>0.22 (31%)</b>  | <b>0.13 (27%)</b>  |
|                 | > 1.65           | 0.08 (9%)                                                              | <b>0.40 (53%)</b> | <b>0.23 (35%)</b> | <b>0.30 (39%)</b> | <b>0.46 (64%)</b>  | <b>0.35 (71%)</b>  |
|                 | < 0.45 (D)       | 0.07 (8%)                                                              | 0.02 (3%)         | 0.06 (9%)         |                   |                    |                    |
|                 | (0.45, 1.65) (D) | 0.10 (11%)                                                             | 0.02 (3%)         | 0.07 (11%)        |                   |                    |                    |
|                 | > 1.65 (D)       | <b>0.15 (16%)</b>                                                      | <b>0.15 (19%)</b> | <b>0.14 (22%)</b> |                   |                    |                    |
| <b>MNase HS</b> | Dense            | <b>0.17 (18%)</b>                                                      | 0.00 (0%)         | <b>0.27 (42%)</b> | 0.06 (7%)         | 0.00 (0%)          | 0.00 (0%)          |
|                 | Open             | <b>0.43 (46%)</b>                                                      | <b>0.58 (75%)</b> | <b>0.12 (19%)</b> | <b>0.70 (93%)</b> | <b>0.71 (100%)</b> | <b>0.51 (100%)</b> |
|                 | Dense (D)        | <b>0.32 (35%)</b>                                                      | 0.00 (0%)         | 0.00 (0%)         |                   |                    |                    |
|                 | Open (D)         | 0.01 (1%)                                                              | <b>0.19 (25%)</b> | <b>0.26 (40%)</b> |                   |                    |                    |
| <b>MAF</b>      | < 0.01           | 0.00 (0%)                                                              | 0.00 (0%)         | 0.00 (0%)         | 0.00 (0%)         | 0.05 (7%)          | <b>0.17 (36%)</b>  |
|                 | (0.01, 0.05)     | <b>0.46 (50%)</b>                                                      | 0.07 (10%)        | 0.09 (14%)        | <b>0.34 (46%)</b> | 0.00 (0%)          | 0.00 (0%)          |
|                 | > 0.05           | <b>0.14 (15%)</b>                                                      | <b>0.40 (54%)</b> | 0.06 (9%)         | <b>0.40 (54%)</b> | <b>0.64 (93%)</b>  | <b>0.31 (64%)</b>  |
|                 | < 0.01 (D)       | 0.00 (0%)                                                              | 0.00 (0%)         | 0.00 (0%)         |                   |                    |                    |
|                 | (0.01, 0.05) (D) | 0.00 (0%)                                                              | <b>0.13 (18%)</b> | <b>0.36 (53%)</b> |                   |                    |                    |
|                 | > 0.05 (D)       | <b>0.32 (35%)</b>                                                      | <b>0.14 (19%)</b> | <b>0.16 (24%)</b> |                   |                    |                    |
| <b>GERP</b>     | 0                | <b>0.46 (49%)</b>                                                      | 0.00 (0%)         | <b>0.16 (24%)</b> | 0.15 (19%)        | 0.00 (0%)          | 0.00 (0%)          |
|                 | > 0              | 0.14 (15%)                                                             | <b>0.58 (76%)</b> | <b>0.23 (36%)</b> | <b>0.61 (81%)</b> | <b>0.72 (100%)</b> | <b>0.51 (100%)</b> |
|                 | 0 (D)            | 0.00 (0%)                                                              | 0.01 (1%)         | 0.00 (0%)         |                   |                    |                    |
|                 | > 0 (D)          | <b>0.32 (35%)</b>                                                      | <b>0.17 (23%)</b> | <b>0.26 (40%)</b> |                   |                    |                    |

Variance partition by functional features. Gene: proximity to genes ( $\leq 1$  kb); Rec.: recombination rate; MNase HS: chromatin openness; MAF: minor allele frequency; GERP: genomic evolutionary rate profiling score. Genomic heritability: variance component at a given bin from functional enrichment models, normalized by the total phenotypic variance. Proportion of genomic heritability explained: ratio of genomic variance at a given bin over the sum of genomic variances across bins.
