# Supplementary material
Source: publisher figshare collection journal article supplement (https://gsajournals.figshare.com/articles/dataset/_/11952225)
Supplement: Supplementary file 7 [file 1]

**Table S6 – Prediction accuracy from GWAS models**

| <b>Validation scheme</b> | <b>Baseline model</b> | <b>Trait</b> | <b>Prediction accuracy (p-value)</b> | <b>Difference in prediction accuracy by QTL effects (p-value)</b> |
|--------------------------|-----------------------|--------------|--------------------------------------|-------------------------------------------------------------------|
| <b>Ames-H ⇒ NAM-H</b>    | DGBLUP                | DTS          | 0.319 ( $2.9 \times 10^{-11}$ )      | -0.059 (0.061)                                                    |
|                          |                       | PH           | 0.259 ( $8.0 \times 10^{-10}$ )      | No QTL                                                            |
|                          |                       | GY           | -0.011 (0.71)                        | No QTL                                                            |
| <b>NAM-H ⇒ Ames-H</b>    | GBLUP                 | DTS          | 0.497 ( $4.8 \times 10^{-9}$ )       | -0.027 (0.075)                                                    |
|                          |                       | PH           | 0.052 (0.079)                        | No QTL                                                            |
|                          |                       | GY           | 0.254 ( $2.7 \times 10^{-6}$ )       | -0.041 (0.11)                                                     |

Validation scheme: training panel ⇒ validation panel; Baseline model: DGBLUP in Ames-H

(polygenic additive and dominance effects), GBLUP in NAM-H (polygenic additive effects

only); Prediction accuracy: average correlation between observed and predicted phenotypes in

validation sets, from the baseline model; Difference in prediction accuracy: difference in

prediction accuracy between baseline model and GWAS model (including fixed additive and

dominance effects of QTL in Ames-H, only additive effects of QTL in NAM-H). Significance of

average prediction accuracies (non-zero mean) and estimated differences in prediction accuracy

(non-zero difference, paired by validation set) was assessed by t-tests.
