# Supplementary material
Source: publisher figshare collection journal article supplement (https://gsajournals.figshare.com/articles/dataset/_/11952225)
Supplement: Supplementary file 8 [file 1]

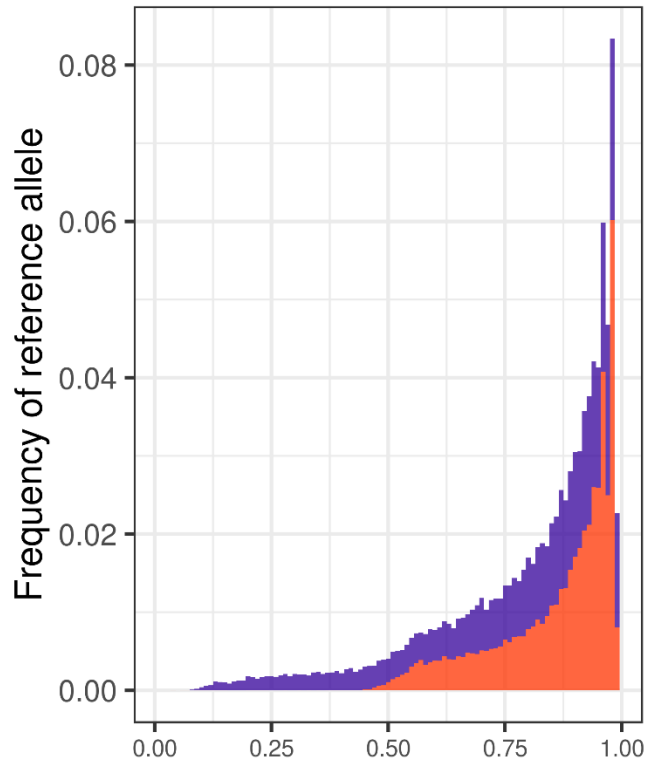

Panel  
■ Ames-H  
■ NAM-H

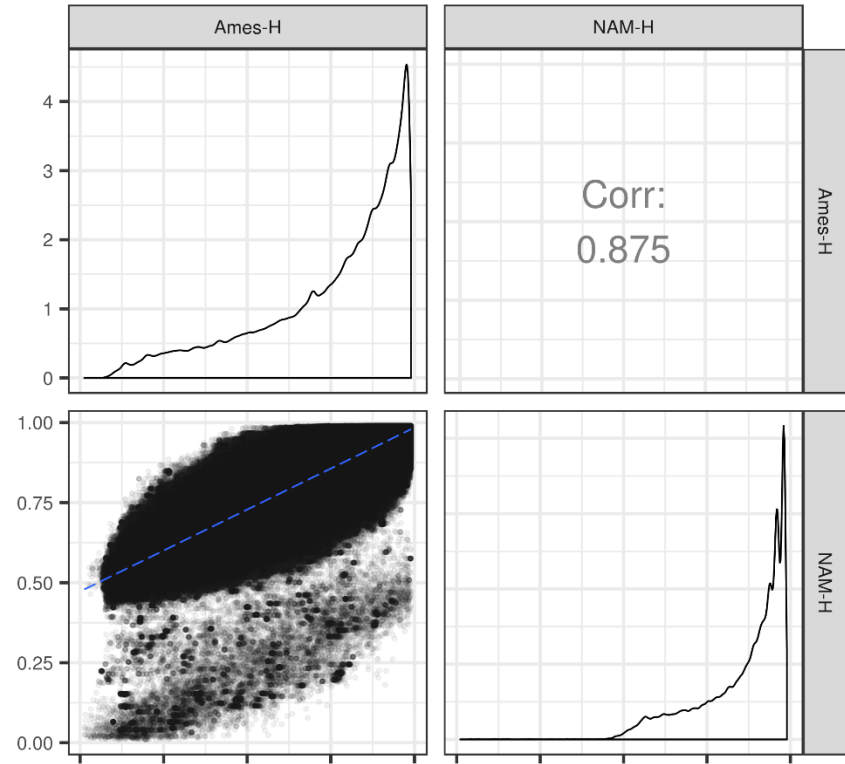

**Figure S3** – Allele frequency (frequency of reference B73 allele) among female parents in Ames-H and NAM-H. Left: distribution of allele frequency in each panel. Right: scatter plots for allele frequencies and correlation across panels.
