# Supplementary material
Source: publisher figshare collection journal article supplement (https://gsajournals.figshare.com/articles/dataset/_/11952225)
Supplement: Supplementary file 9 [file 1]

**Table S2 – High-confidence QTL effects in Ames-H and NAM-H, based on GWAS models and BSLMMs**

| Trait      | Chr.       | Position    | Ames-H      |              |                                                   |             | NAM-H       |                                                    |                                                   |             |
|------------|------------|-------------|-------------|--------------|---------------------------------------------------|-------------|-------------|----------------------------------------------------|---------------------------------------------------|-------------|
|            |            |             | AF          | Effect       | p (FDR)                                           | WPIP        | AF          | Effect                                             | p (FDR)                                           | WPIP        |
| <b>DTS</b> | 1          | 5,819,499   | 0.76        | 0.14         | 0.37 (0.99)                                       | < 0.01      | <b>0.86</b> | <b>0.76</b>                                        | <b>1.8×10<sup>-10</sup> (8.0×10<sup>-7</sup>)</b> | <b>0.93</b> |
|            | 1          | 6,246,295   | 0.61        | -0.31        | 0.022 (0.81)                                      | < 0.01      | <b>0.80</b> | <b>0.48</b>                                        | <b>1.1×10<sup>-5</sup> (0.011)</b>                | <b>0.92</b> |
|            | 2          | 225,200,515 | 0.99        | 1.20         | 0.019 (0.80)                                      | < 0.01      | <b>0.91</b> | <b>0.74</b>                                        | <b>4.1×10<sup>-7</sup> (7.4×10<sup>-4</sup>)</b>  | <b>0.73</b> |
|            | 2          | 225,463,382 | 0.61        | 0.18         | 0.19 (0.99)                                       | < 0.01      | <b>0.77</b> | <b>0.59</b>                                        | <b>2.2×10<sup>-8</sup> (6.2×10<sup>-5</sup>)</b>  | <b>0.90</b> |
|            | 3          | 161,016,441 | <b>0.58</b> | <b>-0.86</b> | <b>7.3×10<sup>-9</sup> (2.6×10<sup>-3</sup>)</b>  | <b>0.55</b> | 0.88        | -0.51                                              | 2.8×10 <sup>-4</sup> (0.13)                       | 0.01        |
|            | 4          | 202,429,351 | <b>0.96</b> | <b>1.74</b>  | <b>1.9×10<sup>-7</sup> (0.014)</b>                | <b>0.51</b> | 0.89        | 0.03                                               | 0.86 (1.0)                                        | < 0.01      |
|            | 7          | 110,855,373 | <b>0.99</b> | <b>3.69</b>  | <b>6.3×10<sup>-10</sup> (4.4×10<sup>-4</sup>)</b> | <b>0.94</b> | 0.95        | 0.07                                               | 0.75 (1.0)                                        | 0.01        |
|            | 8          | 126,761,299 | <b>0.90</b> | <b>-1.04</b> | <b>3.8×10<sup>-7</sup> (0.018)</b>                | <b>0.59</b> | 0.97        | -0.70                                              | 0.023 (0.90)                                      | 0.01        |
|            | 9          | 128,205,378 | 0.67        | 0.19         | 0.21 (0.99)                                       | < 0.01      | <b>0.74</b> | <b>0.55</b>                                        | <b>2.3×10<sup>-6</sup> (3.0×10<sup>-3</sup>)</b>  | <b>0.89</b> |
|            | 9          | 146,679,383 | <b>0.81</b> | <b>-0.73</b> | <b>3.5×10<sup>-6</sup> (0.037)</b>                | <b>0.72</b> | 0.95        | -0.54                                              | 0.010 (0.72)                                      | < 0.01      |
| 10         | 94,059,383 | 0.96        | 0.05        | 0.88 (1.0)   | < 0.01                                            | <b>0.95</b> | <b>2.23</b> | <b>1.3×10<sup>-25</sup> (4.2×10<sup>-20</sup>)</b> | <b>0.99</b>                                       |             |
| 10         | 94,453,179 | 0.97        | 0.80        | 0.041 (0.88) | < 0.01                                            | <b>0.93</b> | <b>2.12</b> | <b>9.6×10<sup>-31</sup> (2.4×10<sup>-24</sup>)</b> | <b>1.01</b>                                       |             |
| <b>GY</b>  | 7          | 175,528,863 | 0.79        | -0.05        | 0.54 (0.99)                                       | 0.04        | <b>0.97</b> | <b>-1.09</b>                                       | <b>2.0×10<sup>-8</sup> (0.013)</b>                | <b>0.70</b> |

Values in bold describe high-confidence QTL (FDR ≤ 0.05 and WPIP ≥ 0.5). Chr.: Chromosome; Position: physical location; AF:

frequency of the major allele (as per the Hapmap 3.2.1 panel) among female parents; Effect: estimated effect of minor allele from

GWAS; p (FDR): p-value by Wald tests and false discovery rate estimated by the method of Benjamini and Hochberg (1995); WPIP:

posterior inclusion probability for non-zero SNP effects in 500-kb sliding windows (250-kb steps), based on BSLMM (Guan and

Stephens 2011).
