# Supplementary material
Source: publisher figshare collection journal article supplement (https://gsajournals.figshare.com/articles/dataset/_/11952225)
Supplement: Supplementary file 11 [file 1]

**Table S3 – Summary statistics about genomic inbreeding in Ames-H**

| <b>Feature</b>        | <b>Standard deviation</b> | <b>Range</b>                   | <b>Trait</b> | <b>Effect estimate (p-value)</b> |
|-----------------------|---------------------------|--------------------------------|--------------|----------------------------------|
| <i>F</i>              | 0.059                     | (-0.091, 0.55)                 | DTS          | -0.089 (0.93)                    |
|                       |                           |                                | PH           | -2.6 ( $2.2 \times 10^{-3}$ )    |
|                       |                           |                                | GY           | -3.6 ( $1.4 \times 10^{-3}$ )    |
| <i>F</i> <sup>2</sup> | 0.015                     | ( $2.2 \times 10^{-9}$ , 0.30) | DTS          | 7.7 ( $7.3 \times 10^{-5}$ )     |
|                       |                           |                                | PH           | 0.97 (0.63)                      |
|                       |                           |                                | GY           | -0.14 (0.96)                     |

Effects tested were *F* (linear effect of genomic inbreeding) and *F*<sup>2</sup> (quadratic effect of genomic inbreeding); standard deviation of genomic inbreeding coefficients were calculated in Ames-H; p-values were obtained from Wald tests for effects of *F* or *F*<sup>2</sup> in Ames-H.
