# Supplementary material
Source: publisher figshare collection journal article supplement (https://gsajournals.figshare.com/articles/dataset/_/11952225)
Supplement: Supplementary file 12 [file 1]

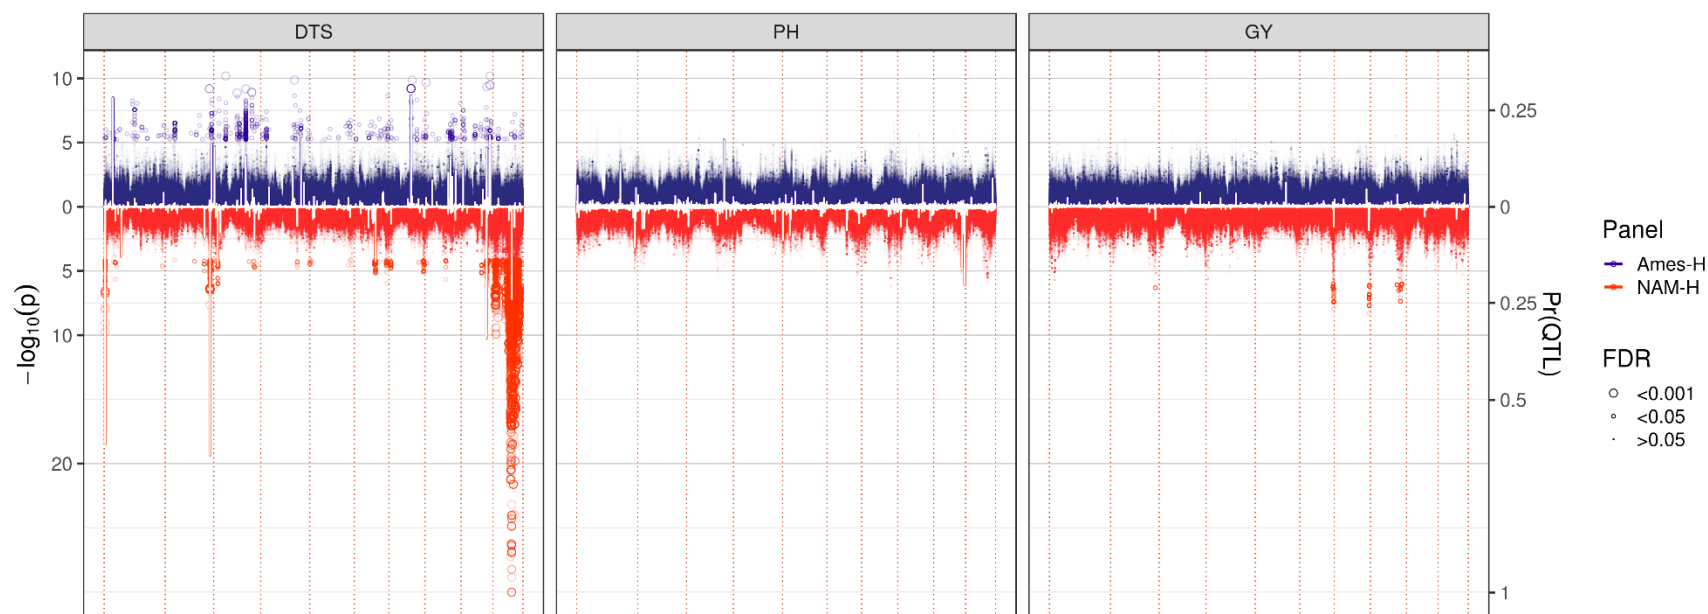

**Figure S4** – Miami plot of marginal additive effects in genome-wide associations studies (GWAS). Open circles:  $-\log_{10}(p)$  values for SNP effect in GWAS models ( $p$ :  $p$ -value from Wald tests); increasing size refers to lower FDR, as estimated by the method of Benjamini and Hochberg (1995). Lines:  $\text{Pr}(\text{QTL})$ , posterior inclusion probability from BSLMM.
