# Supplementary material
Source: publisher figshare collection journal article supplement (https://gsajournals.figshare.com/articles/dataset/_/11952225)
Supplement: Supplementary file 13 [file 1]

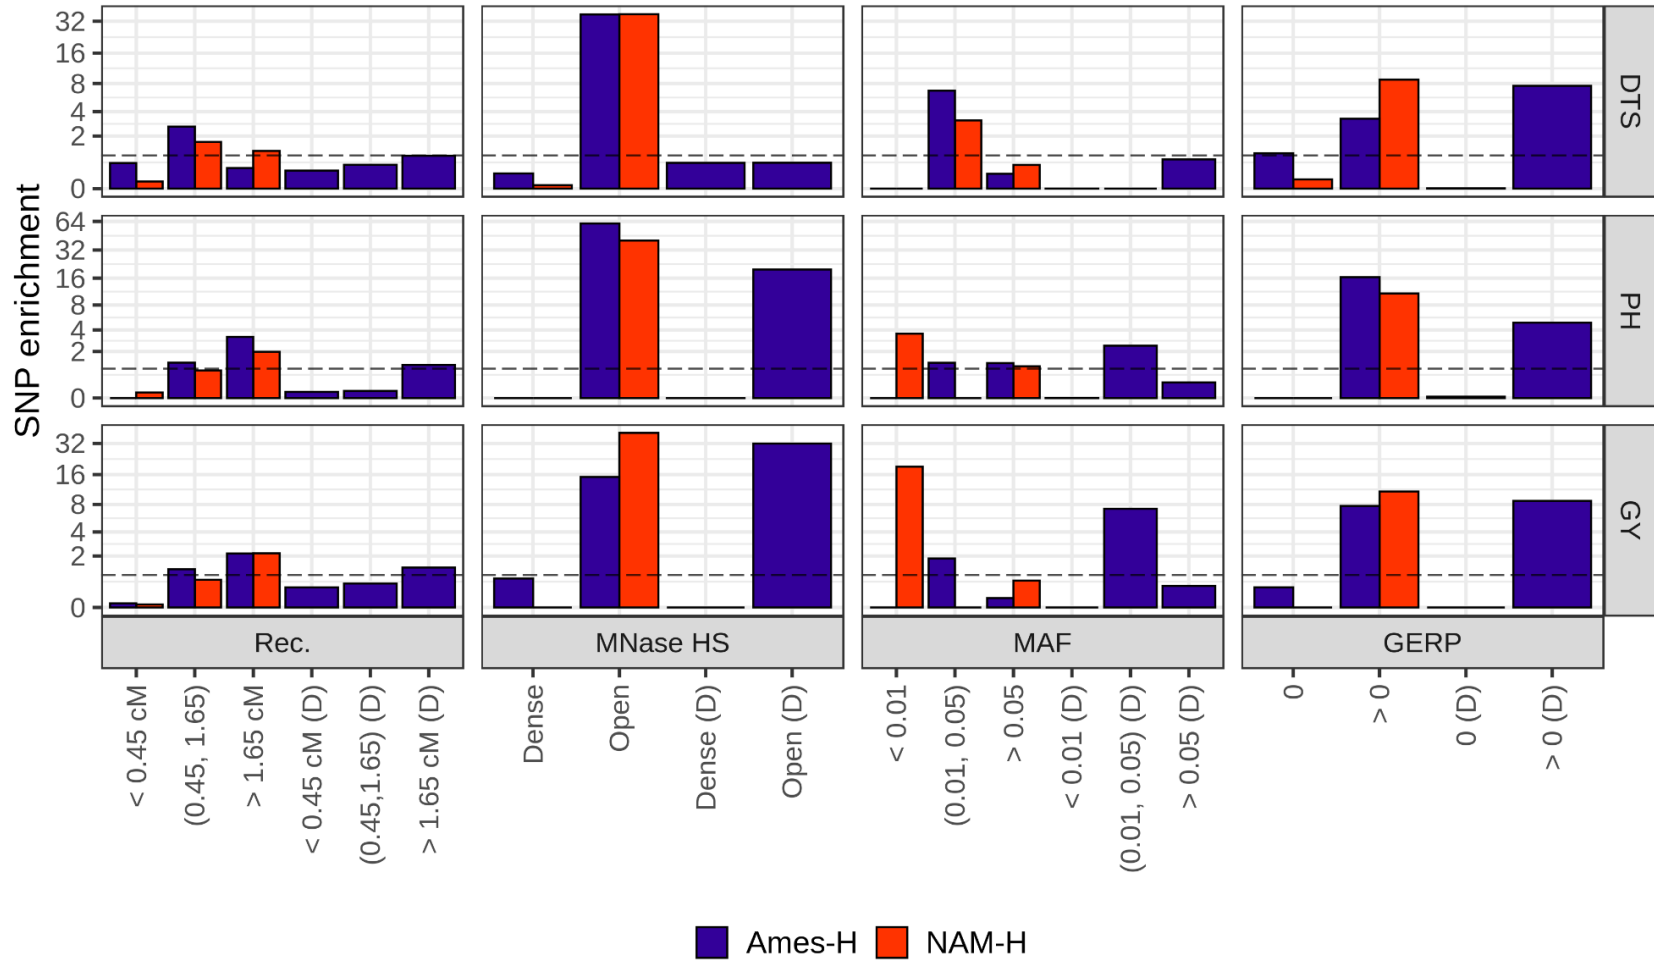

**Figure S5** – SNP enrichment (enrichment in genomic heritability by class of SNPs), for additive effects and dominance effects (D), by bin for structural and evolutionary features in Ames-H and NAM-H. Rec.: recombination rate; MNase HS: chromatin openness; MAF: minor allele frequency; GERP: genomic evolutionary rate profiling score.
