# Supplementary material
Source: publisher figshare collection journal article supplement (https://gsajournals.figshare.com/articles/dataset/_/11952225)
Supplement: Supplementary file 14 [file 1]

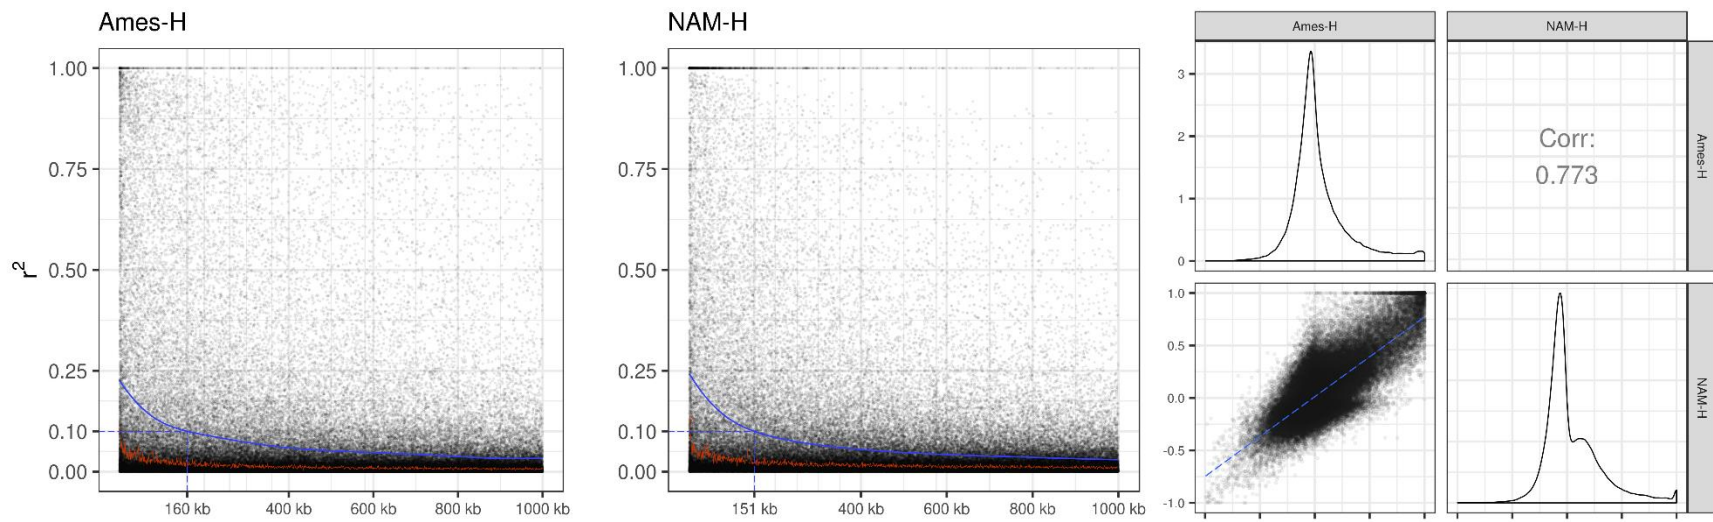

**Figure S2** – Linkage disequilibrium (LD) in Ames-H and NAM-H. Left and middle: decay of LD values (squared correlation of marker scores at marker pairs), adjusted for population structure and relatedness as in Mangin *et al.* (2012), in Ames-H and NAM-H, respectively. Right: scatter plots for adjusted LD values and correlation across panels. LD values were calculated from random SNP pairs, without sharing of SNPs across pairs.
