# Supplementary material
Source: publisher figshare collection journal article supplement (https://gsajournals.figshare.com/articles/dataset/_/11952225)
Supplement: Supplementary file 15 [file 1]

**Table S7 – Significance of variance partition by panel and functional feature**

| Panel                             | Trait | p-value for variance partition |                      |                       |                      |                       |
|-----------------------------------|-------|--------------------------------|----------------------|-----------------------|----------------------|-----------------------|
|                                   |       | Gene                           | Rec.                 | MNase HS              | MAF                  | GERP                  |
| <b>Ames-H</b>                     | DTS   | 0.21                           | 0.29                 | 0.15                  | 0.035                | 0.12                  |
|                                   | PH    | $6.0 \times 10^{-5}$           | $9.1 \times 10^{-4}$ | $6.0 \times 10^{-5}$  | 0.80                 | $8.6 \times 10^{-5}$  |
|                                   | GY    | 0.18                           | 0.24                 | 0.12                  | 0.088                | 0.11                  |
| <b>NAM-H</b>                      | DTS   | $4.6 \times 10^{-3}$           | $4.1 \times 10^{-4}$ | $7.8 \times 10^{-5}$  | $7.7 \times 10^{-4}$ | $3.8 \times 10^{-4}$  |
|                                   | PH    | $1.6 \times 10^{-11}$          | $1.9 \times 10^{-7}$ | $5.6 \times 10^{-10}$ | 0.70                 | $7.5 \times 10^{-12}$ |
|                                   | GY    | $6.1 \times 10^{-5}$           | $1.4 \times 10^{-4}$ | $1.8 \times 10^{-5}$  | 0.033                | $3.4 \times 10^{-6}$  |
| <b>Combined (Fisher's method)</b> | DTS   | $7.8 \times 10^{-3}$           | $1.2 \times 10^{-3}$ | $1.4 \times 10^{-4}$  | $3.1 \times 10^{-4}$ | $5.1 \times 10^{-4}$  |
|                                   | PH    | $3.3 \times 10^{-14}$          | $4.0 \times 10^{-9}$ | $1.1 \times 10^{-12}$ | 0.88                 | $2.3 \times 10^{-14}$ |
|                                   | GY    | $1.3 \times 10^{-4}$           | $3.7 \times 10^{-4}$ | $3.0 \times 10^{-5}$  | 0.020                | $6.0 \times 10^{-6}$  |
|                                   |       | Gene                           | Gene+ Rec.           | Gene+ MNase HS        | Gene+ MAF            | Gene+ GERP            |
| <b>Ames-H</b>                     | DTS   | –                              | 0.31                 | 0.39                  | N/A                  | 0.57                  |
|                                   | PH    | –                              | N/A                  | 0.46                  | 1.0                  | 0.97                  |
|                                   | GY    | –                              | 0.72                 | 0.41                  | 0.054                | 0.61                  |
| <b>NAM-H</b>                      | DTS   | –                              | $8.0 \times 10^{-3}$ | $6.0 \times 10^{-3}$  | $1.0 \times 10^{-4}$ | 0.032                 |
|                                   | PH    | –                              | 1.0                  | 0.83                  | 1.0                  | 0.20                  |
|                                   | GY    | –                              | 0.26                 | 0.13                  | 0.024                | 0.019                 |
| <b>Combined (Fisher's method)</b> | DTS   | –                              | 0.017                | 0.017                 | N/A                  | 0.091                 |
|                                   | PH    | –                              | N/A                  | 0.75                  | 1.0                  | 0.51                  |
|                                   | GY    | –                              | 0.50                 | 0.21                  | $9.8 \times 10^{-3}$ | 0.063                 |

Significance of variance partition by gene proximity (Gene), structural features (Rec., MNase HS), and evolutionary features (MAF, GERP); p-values were obtained by likelihood ratio test comparing the functional enrichment model (partitioning variance of additive and dominance marker effects in Ames-H, or additive marker effects only in NAM-H) to the baseline model: no partition (top) or variance partition by gene proximity (bottom). N/A: the fitting algorithm could not converge to a solution.
